# Supplementary material for: Diagnosis of Aortic Dissection in Emergency Department Patients is Rare
Source: PubMed Central journal article supplement (PMC4644027; doi:10.5811/westjem.2015.6.25752), 2015-10-20
Supplement: wjem-16-629-s001.pdf [file wjem-16-629-s001.pdf]

1 Appendix: ICD-9 codes of diagnoses potentially presenting with atraumatic chest pain.

| ICD-9<br>code | Diagnosis                                                                      |
|---------------|--------------------------------------------------------------------------------|
| 396.9         | Mitral and aortic valve diseases unspecified                                   |
| 398.90        | Rheumatic heart disease unspecified                                            |
| 402.91        | Unspecified hypertensive heart disease with heart failure                      |
| 410.00        | Acute myocardial infarction of anterolateral wall episode of care unspecified  |
| 410.10        | Acute myocardial infarction of other anterior wall episode of care unspecified |
| 410.11        | Acute myocardial infarction of other anterior wall initial episode of care     |
| 410.12        | Acute myocardial infarction of other anterior wall subsequent episode of care  |
| 410.20        | Acute myocardial infarction of inferolateral wall episode of care unspecified  |
| 410.21        | Acute myocardial infarction of inferolateral wall initial episode of care      |
| 410.31        | Acute myocardial infarction of inferoposterior wall initial episode of care    |
| 410.40        | Acute myocardial infarction of other inferior wall episode of care unspecified |
| 410.41        | Acute myocardial infarction of other inferior wall initial episode of care     |
| 410.50        | Acute myocardial infarction of other lateral wall episode of care unspecified  |
| 410.51        | Acute myocardial infarction of other lateral wall initial episode of care      |
| 410.60        | True posterior wall infarction episode of care unspecified                     |
| 410.61        | True posterior wall infarction initial episode of care                         |
| 410.70        | Subendocardial infarction episode of care unspecified                          |
| 410.71        | Subendocardial infarction initial episode of care                              |
| 410.72        | Subendocardial infarction subsequent episode of care                           |
| 410.81        | Acute myocardial infarction of other specified sites initial episode of care   |
| 410.90        | Acute myocardial infarction of unspecified site episode of care unspecified    |
| 410.91        | Acute myocardial infarction of unspecified site initial episode of care        |
| 410.92        | Acute myocardial infarction of unspecified site subsequent episode of care     |
| 411.0         | Postmyocardial infarction syndrome                                             |
| 411.81        | Acute coronary occlusion without myocardial infarction                         |
| 414.00        | Coronary atherosclerosis of unspecified type of vessel native or graft         |
| 414.10        | Aneurysm of heart (wall)                                                       |
| 414.9         | Chronic ischemic heart disease unspecified                                     |
| 415.11        | Iatrogenic pulmonary embolism and infarction                                   |
| 415.12        | Septic pulmonary embolism                                                      |
| 415.19        | Other pulmonary embolism and infarction                                        |
| 416.9         | Chronic pulmonary heart disease unspecified                                    |
| 417.1         | Aneurysm of pulmonary artery                                                   |
| 417.8         | Other specified diseases of pulmonary circulation                              |
| 420.0         | Acute pericarditis in diseases classified elsewhere                            |
| 420.90        | Acute pericarditis unspecified                                                 |
| 420.91        | Acute idiopathic pericarditis                                                  |
| 421.9         | Acute endocarditis unspecified                                                 |
| 422.90        | Acute myocarditis unspecified                                                  |

422.92 Septic myocarditis  
423.1 Adhesive pericarditis  
423.2 Constrictive pericarditis  
423.3 Cardiac tamponade  
423.8 Other specified diseases of pericardium  
428.1 Left heart failure  
428.9 Heart failure unspecified  
429.0 Myocarditis unspecified  
429.1 Myocardial degeneration  
429.2 Cardiovascular disease unspecified  
429.89 Other ill-defined heart diseases  
440.0 Atherosclerosis of aorta  
440.9 Generalized and unspecified atherosclerosis  
441.00 Dissection of aorta aneurysm unspecified site  
441.01 Dissection of aorta thoracic  
441.03 Dissection of aorta thoracoabdominal  
441.1 Thoracic aneurysm ruptured  
441.2 Thoracic aneurysm without rupture  
441.5 Aortic aneurysm of unspecified site ruptured  
441.9 Aortic aneurysm of unspecified site without rupture  
444.1 Embolism and thrombosis of thoracic aorta  
519.3 Other diseases of mediastinum not elsewhere classified  
575.0 Acute cholecystitis  
745.4 Ventricular septal defect  
746.89 Other specified congenital anomalies of heart  
746.9 Unspecified congenital anomaly of heart  
747.22 Congenital atresia and stenosis of aorta  
785.2 Undiagnosed cardiac murmurs  
786.50 Unspecified chest pain  
786.51 Precordial pain  
786.52 Painful respiration  
786.59 Other chest pain  
787.1 Heartburn  
995.59 Other child abuse and neglect

---
